# Supplementary material for: Temperature and Stagnation Effects on Ozone Sensitivity to NO x and VOC: An Adjoint Modeling Study in Central California
Source: Copernicus journal article supplement (doi:10.5194/egusphere-2025-3629), 2025-08-22
Supplement: Supplementary file 1 [file egusphere-2025-3629-supplement.pdf]

Supporting information for

## **Temperature and Stagnation Effects on Ozone Sensitivity to NO<sub>x</sub> and VOC: An Adjoint Modeling Study in Central California**

Yuhan Wang<sup>1</sup>, Lucas Bastien<sup>2,3</sup>, Yuan Wang<sup>1</sup>, Ling Jin<sup>3</sup>, and Robert Harley<sup>4</sup>

<sup>1</sup>Department of Earth System Science, Stanford University, Stanford, CA 94305, USA

<sup>2</sup>Institute of Environmental Geosciences, National Centre for Scientific Research, Grenoble 38058, France

<sup>3</sup>Energy Technologies Area, Lawrence Berkeley National Laboratory, Berkeley, CA 94720, USA

<sup>4</sup>Department of Civil and Environmental Engineering, University of California, Berkeley, CA 94720, USA

*Correspondence to:* Ling Jin ([ljin@lbl.gov](mailto:ljin@lbl.gov)) and Robert Harley ([harley@ce.berkeley.edu](mailto:harley@ce.berkeley.edu))

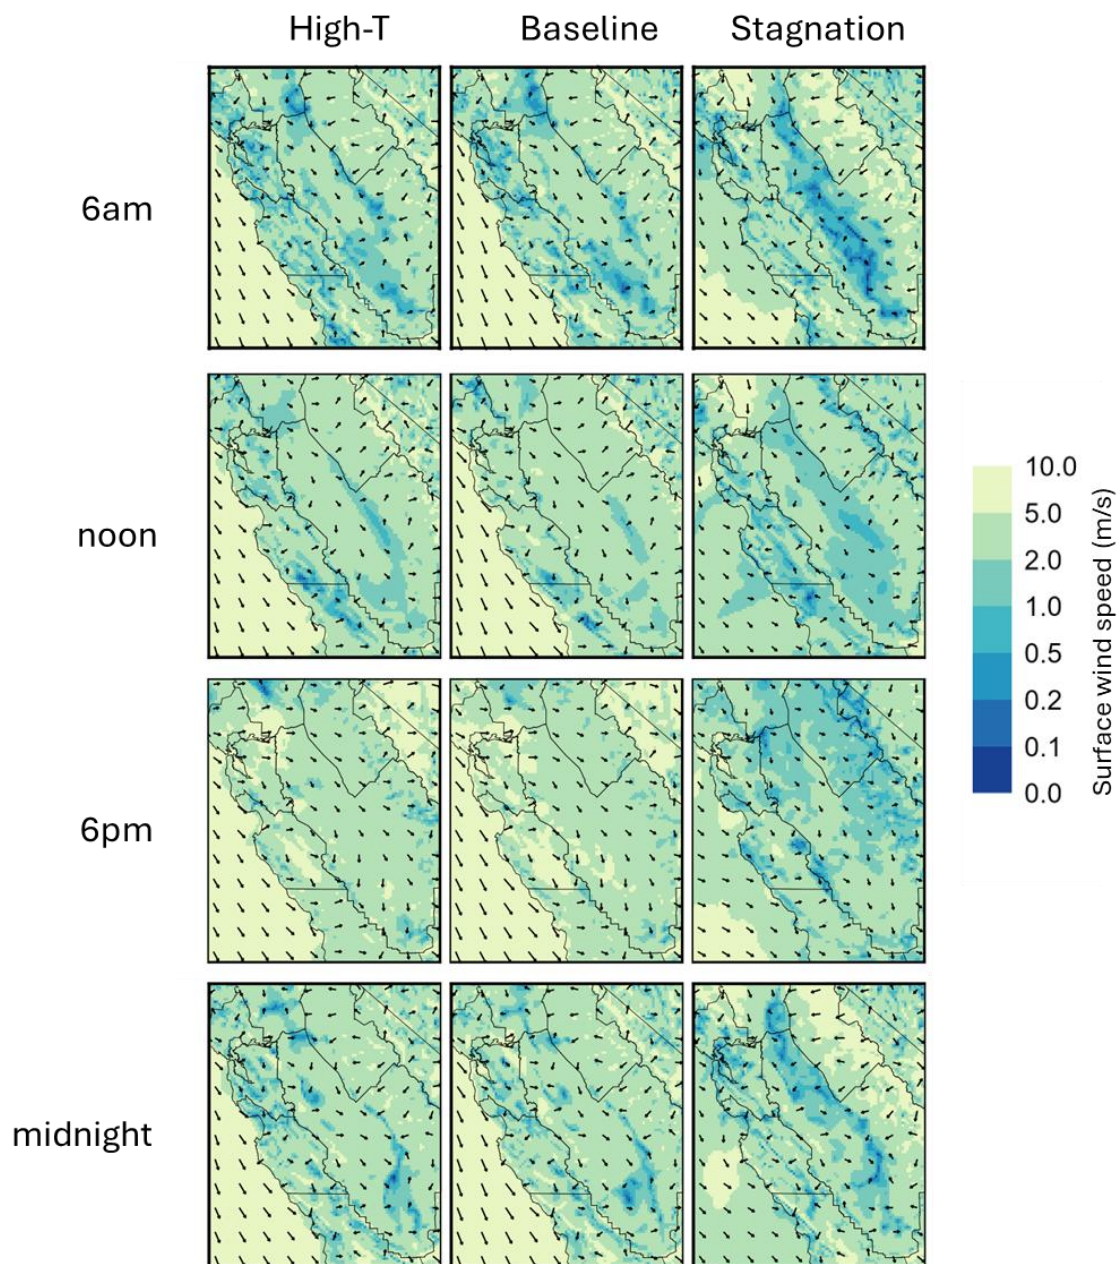

**Figure S1.** Surface wind fields at different hour of day (6am, noon, 6pm, midnight) under high-T (left column), baseline (middle), and stagnation (right column) meteorological scenarios. Arrow represents wind direction, and color indicates wind speed.

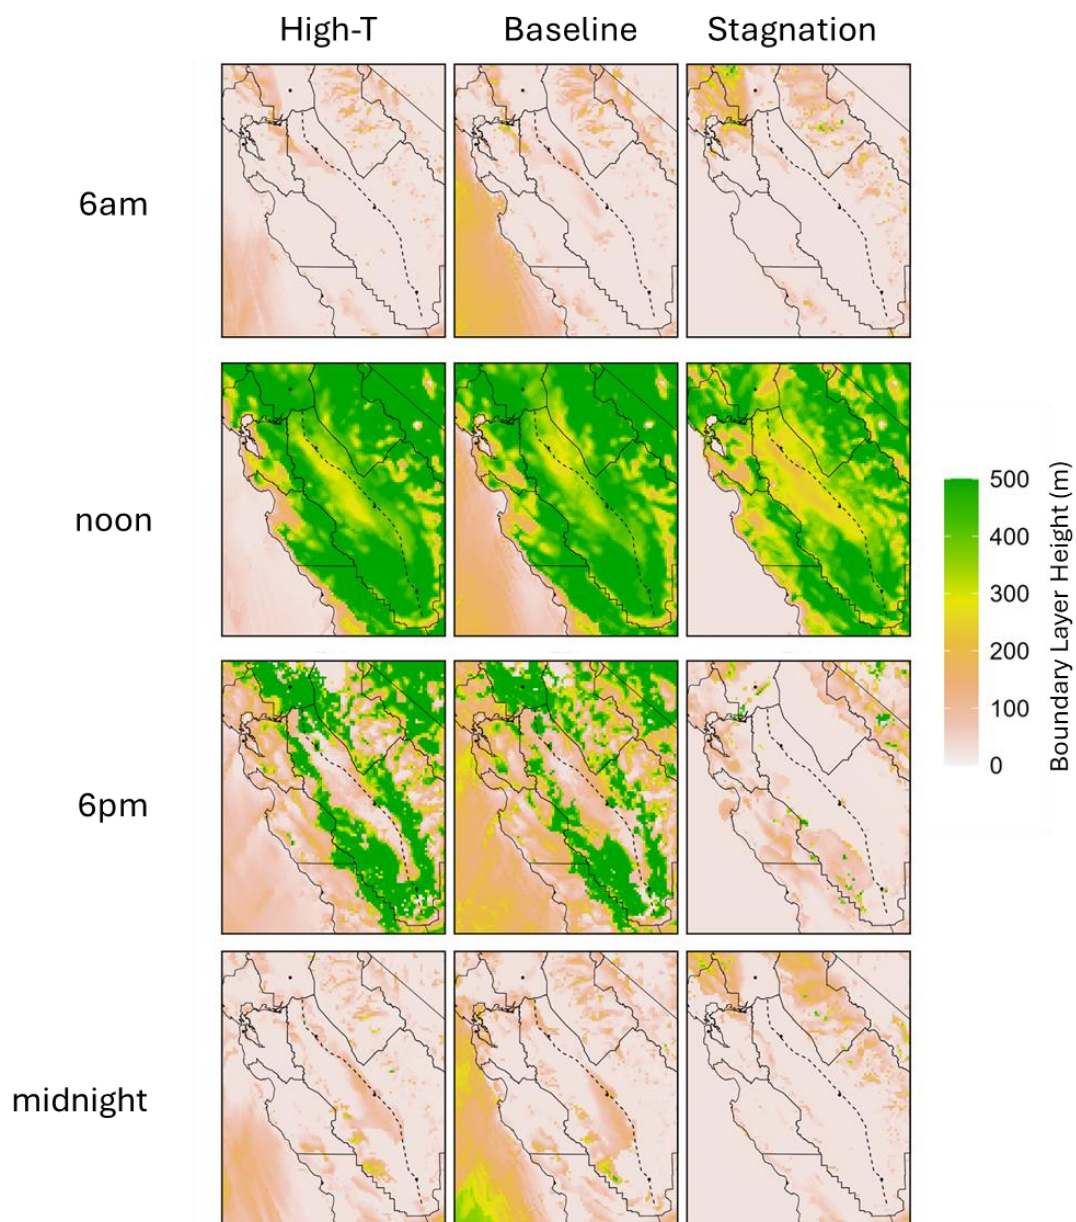

**Figure S2.** Planetary Boundary Layer (PBL) heights at different hour of day (6am, noon, 6pm, midnight) under high-T (left column), baseline (middle), and stagnation (right column) meteorological scenarios.



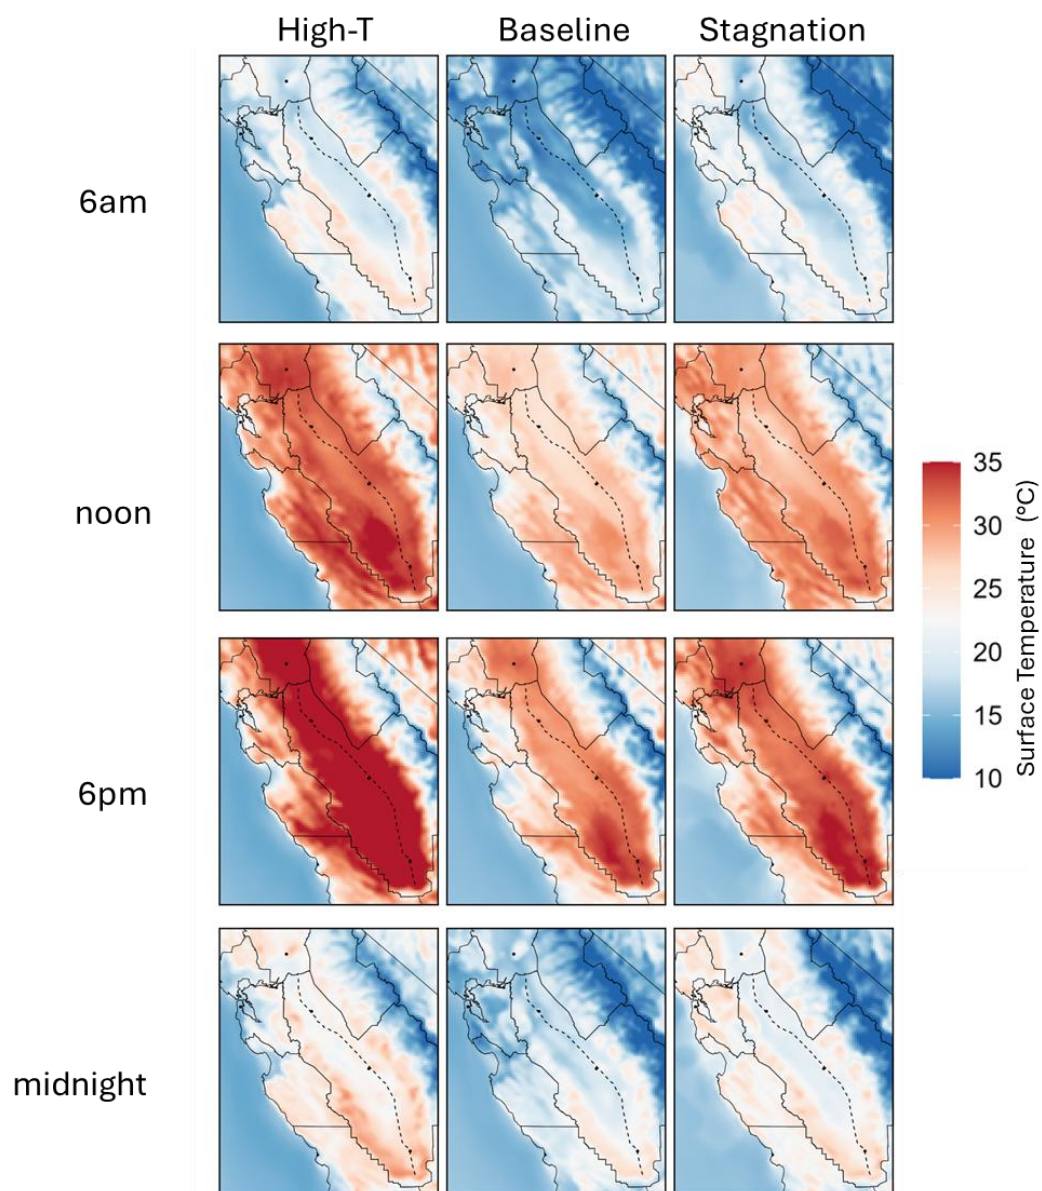

**Figure S3.** Surface temperature fields at different hour of day (6am, noon, 6pm, midnight) under high-T (left column), baseline (middle), and stagnation (right column) meteorological scenarios.

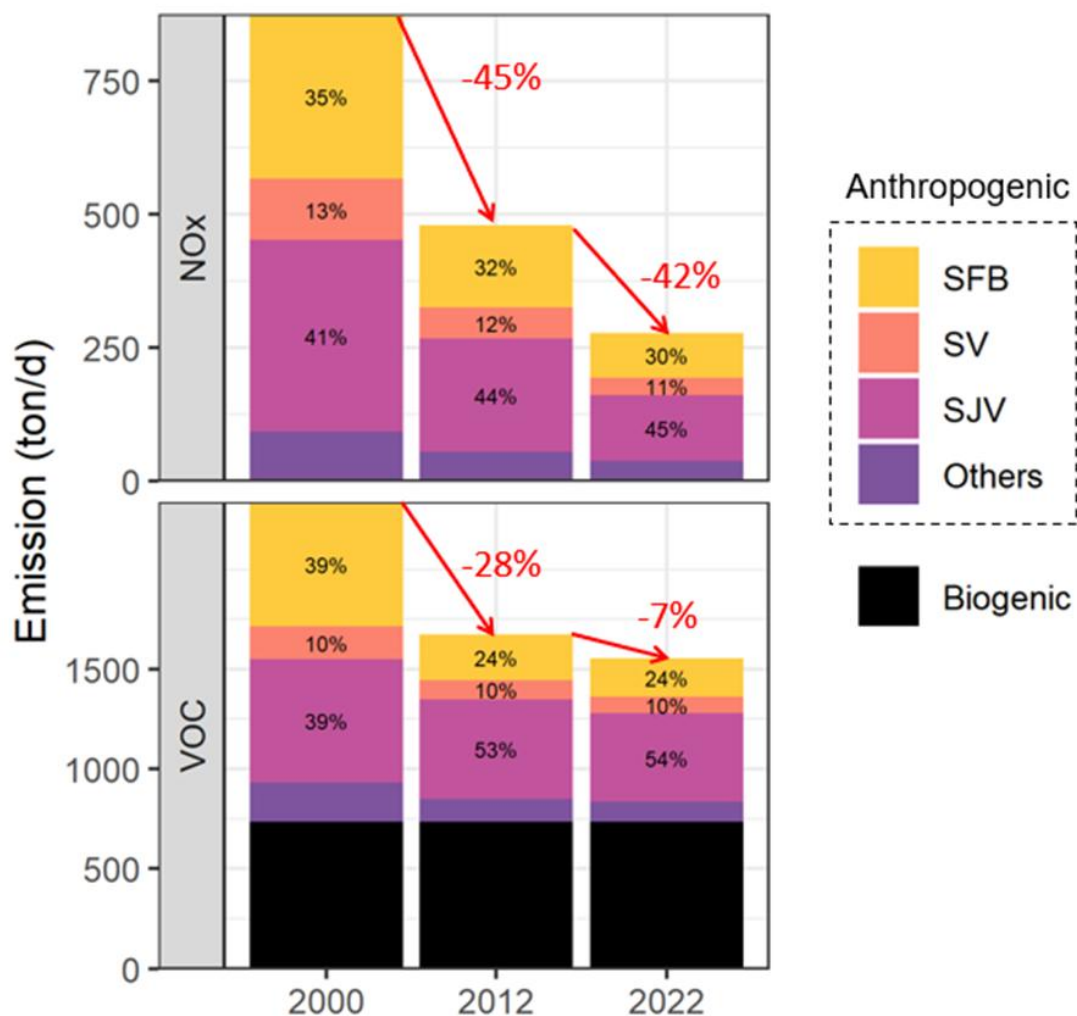

**Figure S4.** Domainwide emission sums of NO<sub>x</sub> (top panel) and VOC (bottom panel). Anthropogenic NO<sub>x</sub> and VOC emissions are colored by source region, and biogenic emissions are colored in black.

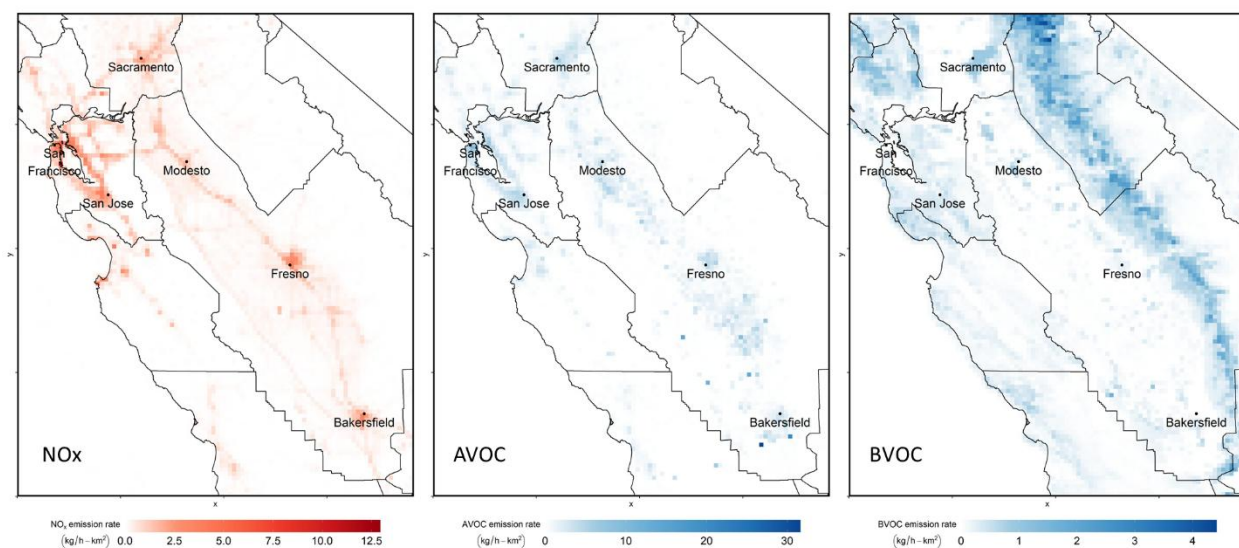

**Figure S5.** Spatial distributions of NO<sub>x</sub> (left), anthropogenic VOC (middle) and biogenic VOC (right) emissions in year 2012. Major cities in the domain are labeled.

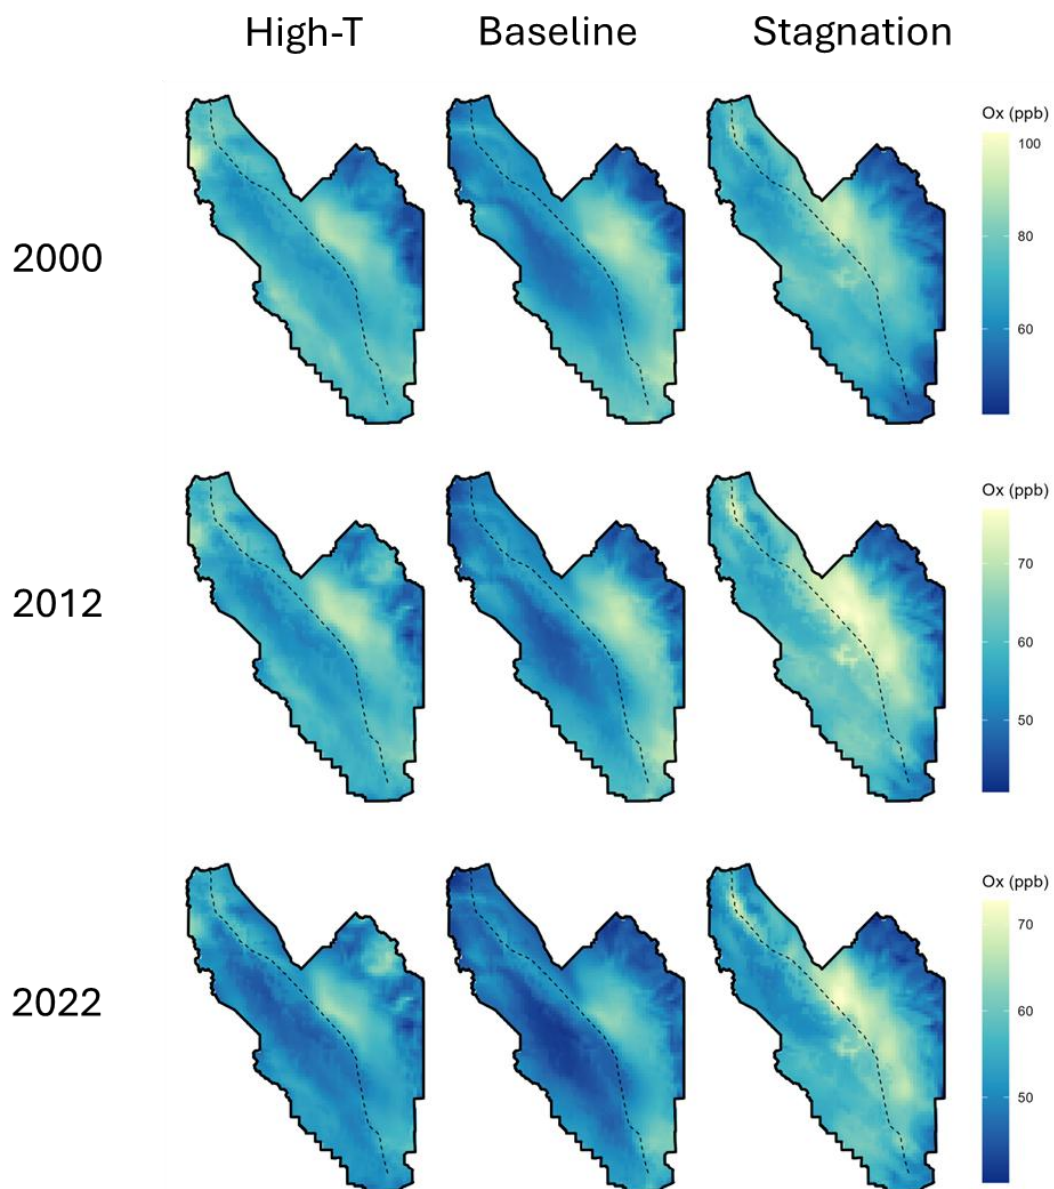

**Figure S6.** Spatial distributions of simulated 8-hour (10am-6pm) Odd Oxygen ( $O_x = O_3 + NO_2$ ) concentration inside the San Joaquin Valley. Note that color legends vary for different years.

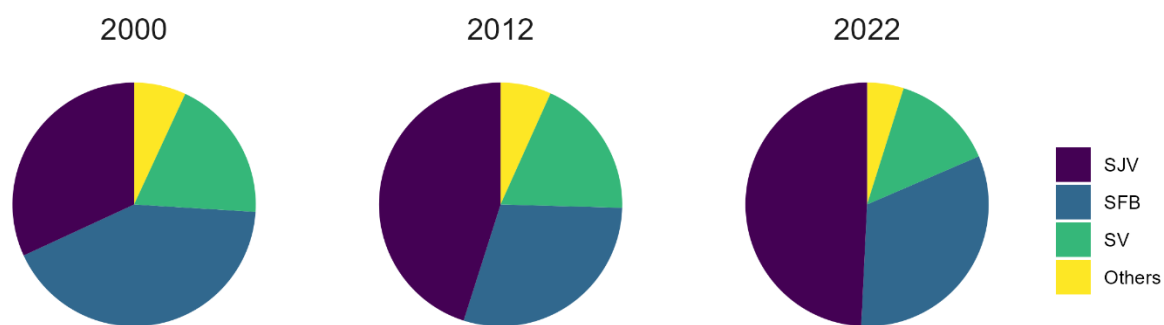

**Figure S7.** Breakdown of anthropogenic contributions by source region: San Joaquin Valley (SJV), San Francisco Bay (SFB), Sacramento Valley (SV), and other air basins (e.g., North Central Coast, South Central Coast, Mountain Counties). Results shown are for baseline meteorology.



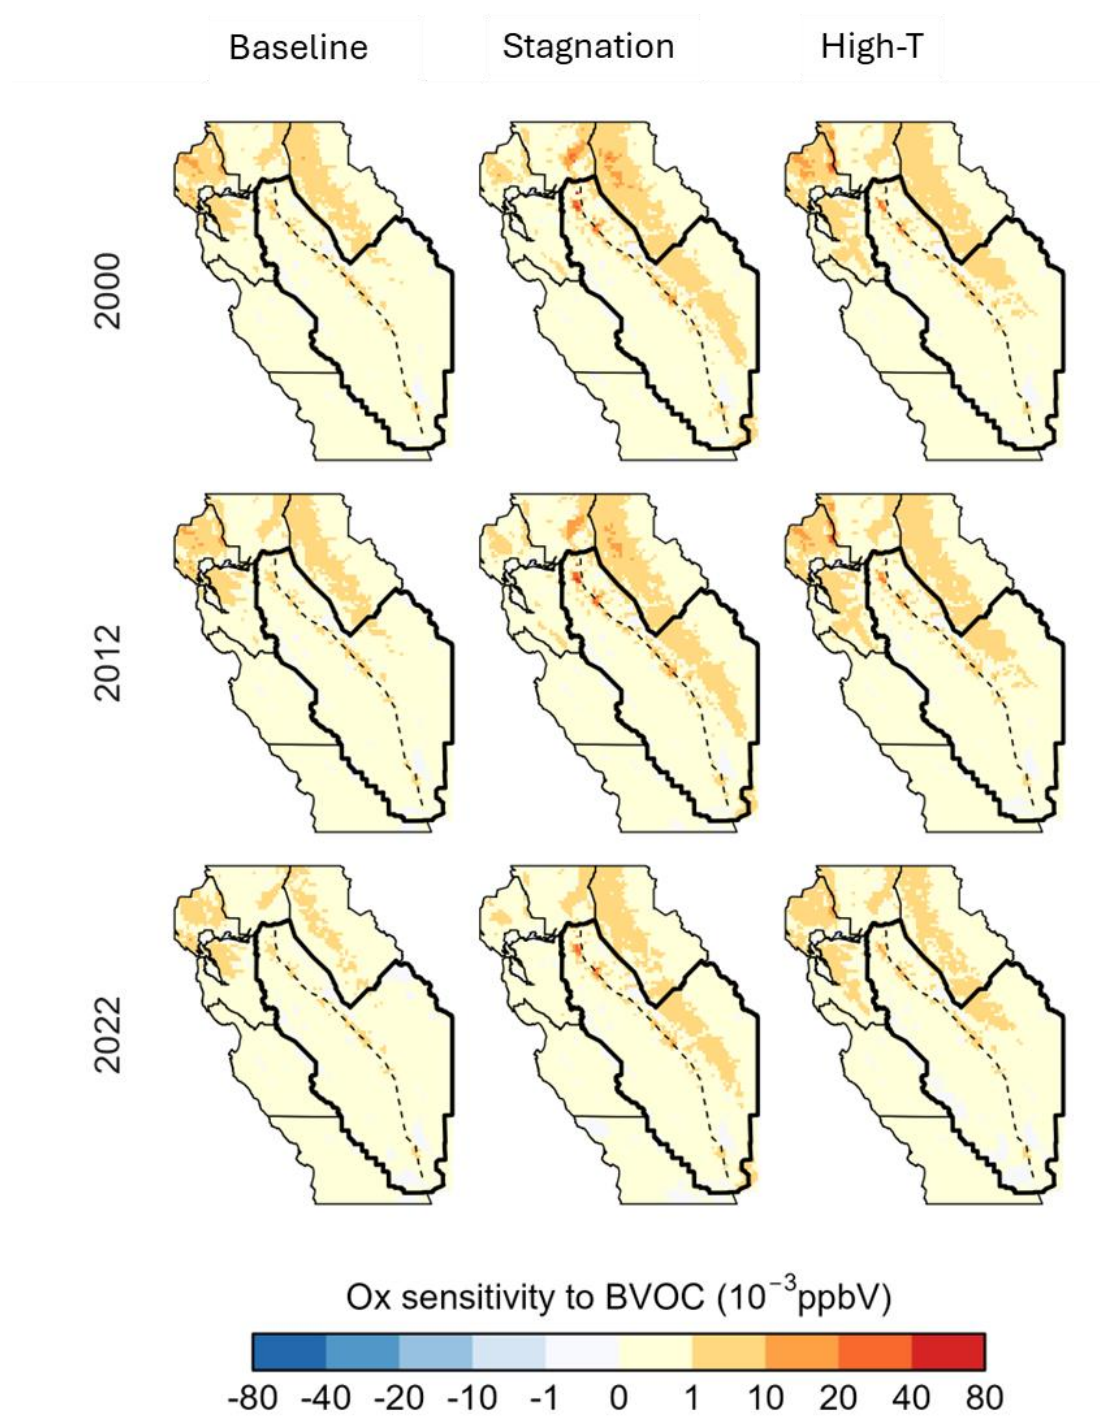

**Figure S8.** Spatial distribution of sensitivity to biogenic VOC (BVOC) under varying emission and meteorology scenarios.

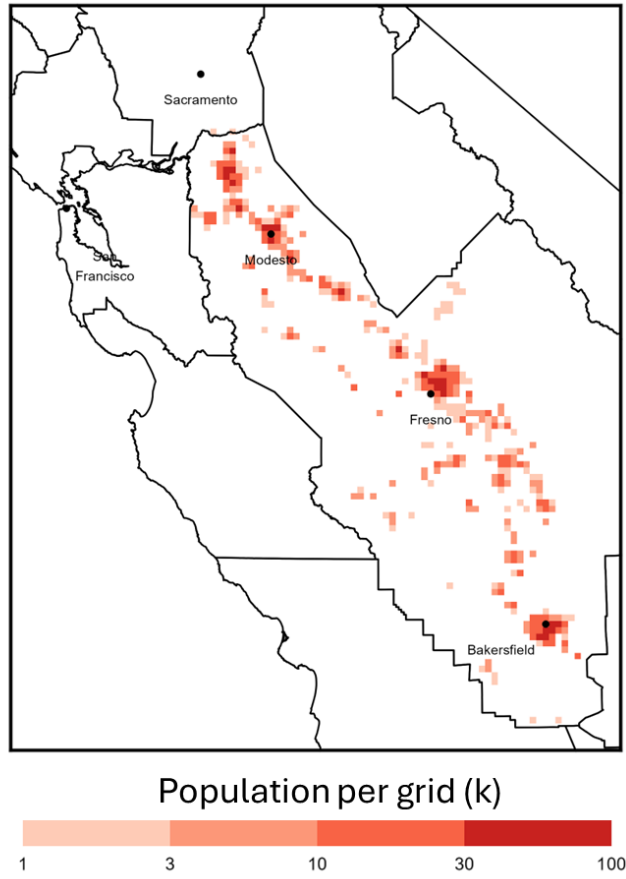

**Figure S9.** Population distribution inside the San Joaquin Valley.

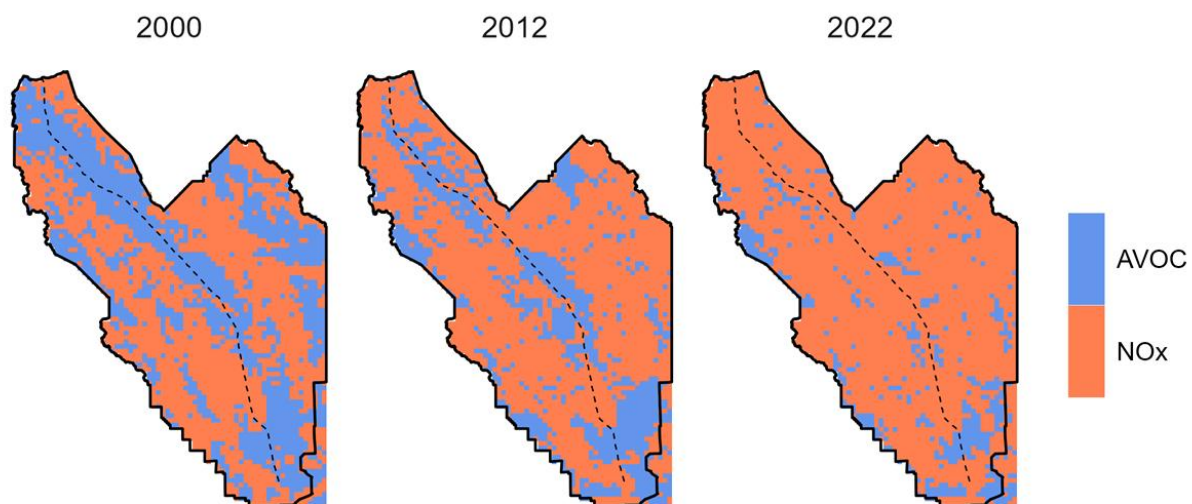

**Figure S10.** Preferred precursor type to target inside the San Joaquin Valley (SJV). A grid cell is colored in blue if its anthropogenic VOC (AVOC) contribution to SJV Ox outweighs NOx contribution, and colored in orange otherwise. Results shown are for baseline meteorology.

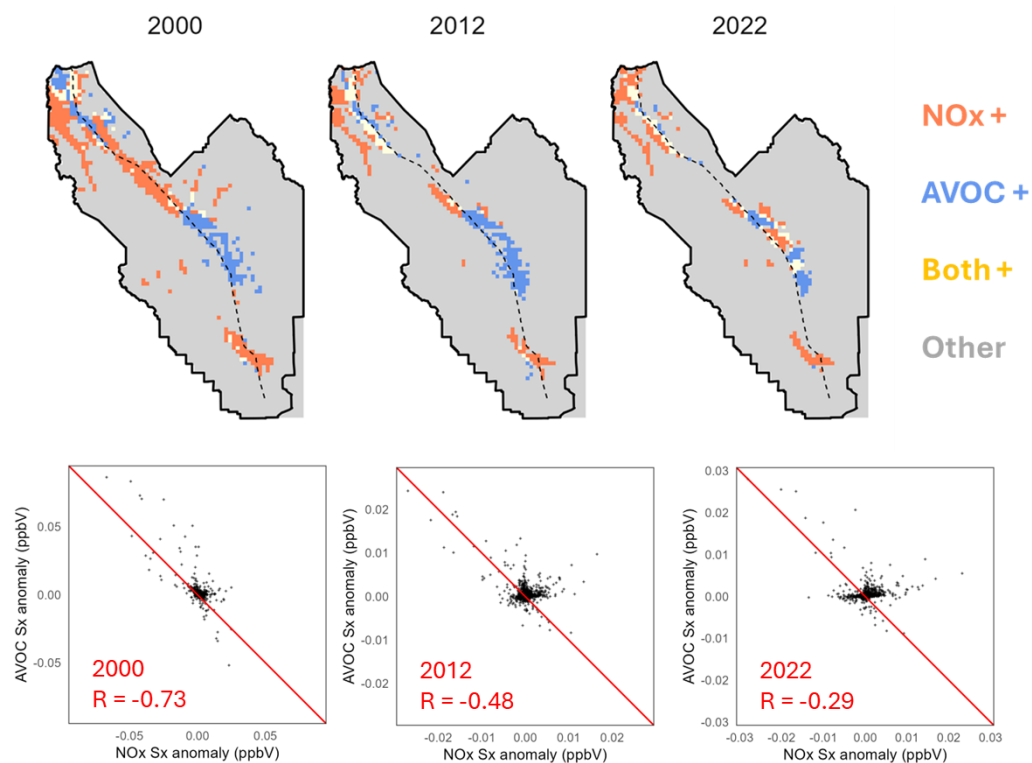

**Figure S11.** Maps (top row) show where high-T conditions increase sensitivity to NOx (orange), anthropogenic VOC (blue), or both (yellow). Gray-colored portions indicate source areas where sensitivity changes are negligible. Scatter plots (bottom row) compare changes in sensitivity to NOx versus AVOC at grid cell level, when meteorology switches from baseline to high-T.

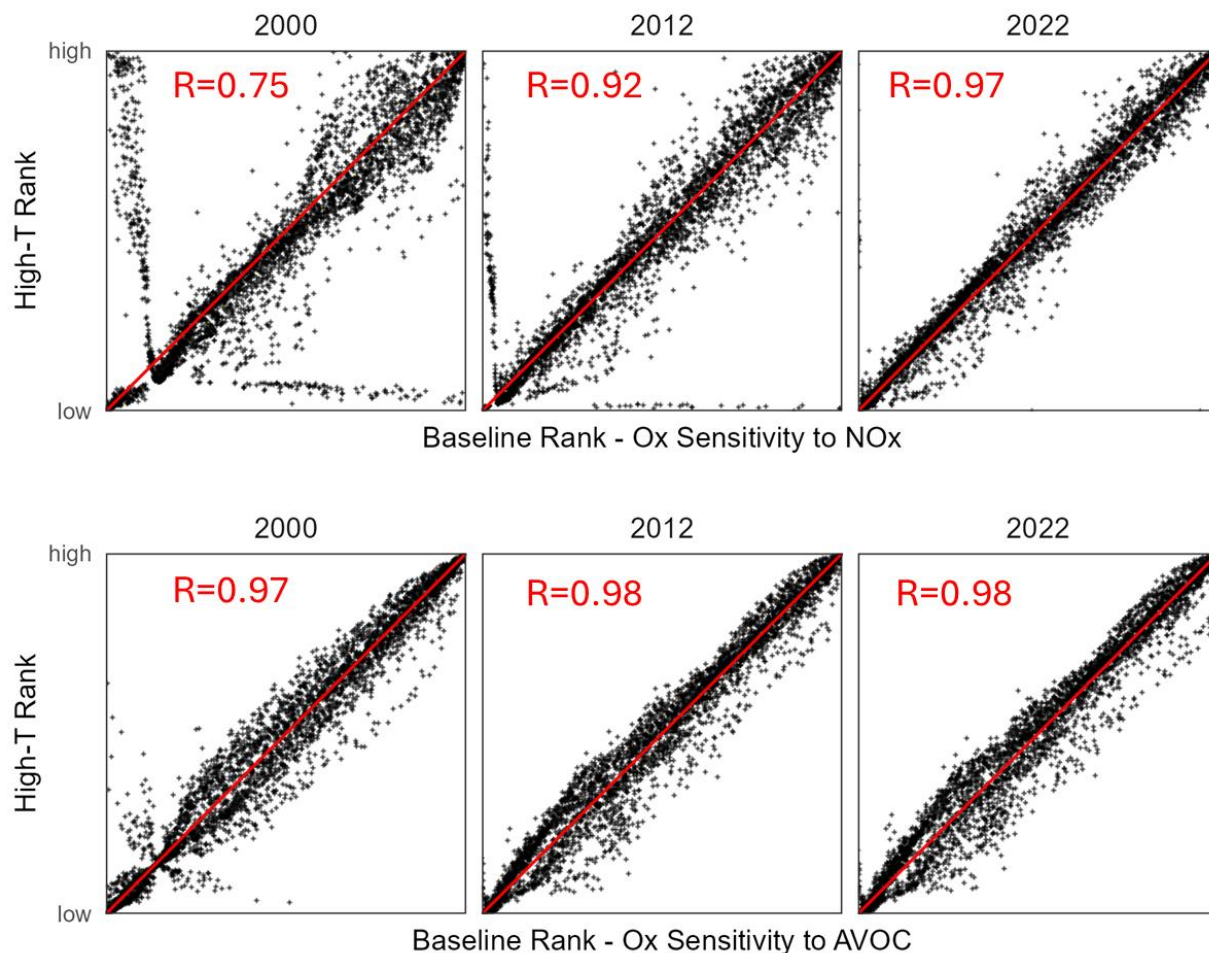

**Figure S12.** Baseline versus high-T rankings of all San Joaquin Valley (SVJ) grid cells based on their individual NO<sub>x</sub> (top) and AVOC (bottom) contributions to the SVJ Ox receptor. Higher rankings indicate greater effectiveness when targeting these source areas for emission control. Large correlation coefficients reflect strong consistency in optimal source control strategies between baseline and high-T conditions.



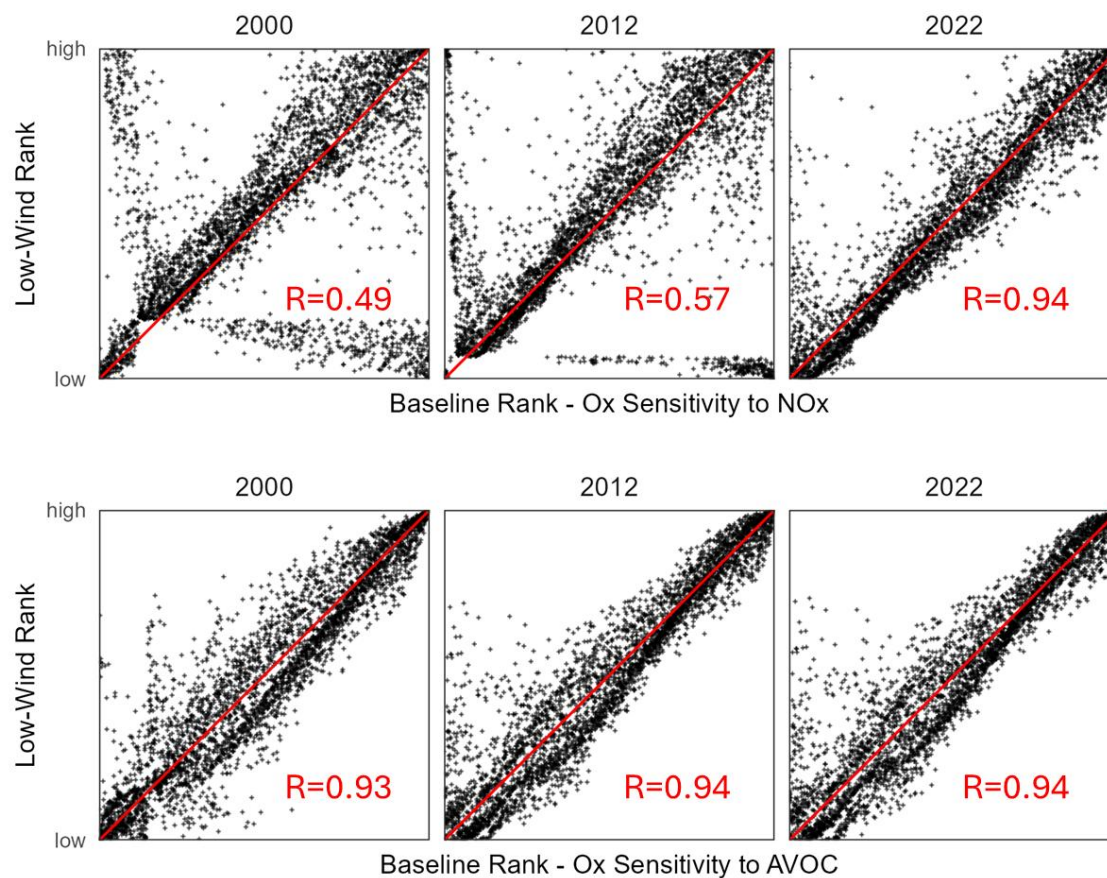

**Figure S13.** Baseline versus stagnation rankings of all San Joaquin Valley (SVJ) grid cells based on their individual NO<sub>x</sub> (top) and AVOC (bottom) contributions to the SVJ Ox receptor. Higher rankings indicate greater effectiveness when targeting these source areas for emission control. Small correlation coefficients for NO<sub>x</sub> reflect limited consistency in optimal source control strategies between baseline and stagnant conditions.
